# Supplementary material
Source: publisher figshare collection journal article supplement (https://acs.figshare.com/ndownloader/files/3782629)
Supplement: Supplementary file 1 [file 3782629]

data_qlq42

 

_audit_creation_method            SHELXL-97

_chemical_name_systematic

;

 ?

;

_chemical_name_common             ?

_chemical_melting_point           ?

_chemical_formula_moiety          ?

_chemical_formula_sum

 'C32 H32 N O4 P'

_chemical_formula_weight          525.56

 

loop_

 _atom_type_symbol

 _atom_type_description

 _atom_type_scat_dispersion_real

 _atom_type_scat_dispersion_imag

 _atom_type_scat_source

 'C'  'C'   0.0033   0.0016

 'International Tables Vol C Tables 4.2.6.8 and 6.1.1.4'

 'H'  'H'   0.0000   0.0000

 'International Tables Vol C Tables 4.2.6.8 and 6.1.1.4'

 'N'  'N'   0.0061   0.0033

 'International Tables Vol C Tables 4.2.6.8 and 6.1.1.4'

 'O'  'O'   0.0106   0.0060

 'International Tables Vol C Tables 4.2.6.8 and 6.1.1.4'

 'P'  'P'   0.1023   0.0942

 'International Tables Vol C Tables 4.2.6.8 and 6.1.1.4'

 

_symmetry_cell_setting            Orthorhombic

_symmetry_space_group_name_H-M    P2(1)2(1)2(1)

 

loop_

 _symmetry_equiv_pos_as_xyz

 'x, y, z'

 '-x+1/2, -y, z+1/2'

 '-x, y+1/2, -z+1/2'

 'x+1/2, -y+1/2, -z'

 

_cell_length_a                    8.4161(2)

_cell_length_b                    13.3624(3)

_cell_length_c                    24.8701(5)

_cell_angle_alpha                 90.00

_cell_angle_beta                  90.00

_cell_angle_gamma                 90.00

_cell_volume                      2796.87(11)

_cell_formula_units_Z             4

_cell_measurement_temperature     296(2)

_cell_measurement_reflns_used     9836

_cell_measurement_theta_min       2.24

_cell_measurement_theta_max       25.20

 

_exptl_crystal_description        BLOCK

_exptl_crystal_colour             colourless

_exptl_crystal_size_max           0.46

_exptl_crystal_size_mid           0.44

_exptl_crystal_size_min           0.40

_exptl_crystal_density_meas       '?'

_exptl_crystal_density_diffrn     1.248

_exptl_crystal_density_method     'not measured'

_exptl_crystal_F_000              1112

_exptl_absorpt_coefficient_mu     0.136

_exptl_absorpt_correction_type    multi-scan

_exptl_absorpt_correction_T_min   0.6658

_exptl_absorpt_correction_T_max   0.7456

_exptl_absorpt_process_details    'SAINT ver 7.34; Bruker SADABS'

 

_exptl_special_details

;

 ?

;

 

_diffrn_ambient_temperature       296(2)

_diffrn_radiation_wavelength      0.71073

_diffrn_radiation_type            MoK\a

_diffrn_radiation_source          'fine-focus sealed tube'

_diffrn_radiation_monochromator   graphite

_diffrn_measurement_device_type   'Bruker APEXII CCD area detector'

_diffrn_measurement_method        'phi and omega scans'

_diffrn_detector_area_resol_mean  ?

_diffrn_standards_number          ?

_diffrn_standards_interval_count  ?

_diffrn_standards_interval_time   ?

_diffrn_standards_decay_%         ?

_diffrn_reflns_number             34196

_diffrn_reflns_av_R_equivalents   0.0365

_diffrn_reflns_av_sigmaI/netI     0.0325

_diffrn_reflns_limit_h_min        -10

_diffrn_reflns_limit_h_max        10

_diffrn_reflns_limit_k_min        -17

_diffrn_reflns_limit_k_max        17

_diffrn_reflns_limit_l_min        -31

_diffrn_reflns_limit_l_max        32

_diffrn_reflns_theta_min          1.64

_diffrn_reflns_theta_max          27.41

_reflns_number_total              6351

_reflns_number_gt                 4746

_reflns_threshold_expression      >2sigma(I)

 

_computing_data_collection        'Bruker APEXII'

_computing_cell_refinement        'Bruker APEXII'

_computing_data_reduction         'Bruker SAINT'

_computing_structure_solution     'SHELXS-97 (Sheldrick, 1990)'

_computing_structure_refinement   'SHELXL-97 (Sheldrick, 1997)'

_computing_molecular_graphics     'Bruker SHELXTL'

_computing_publication_material   'Bruker SHELXTL'

 

_refine_special_details

;

 Refinement of F^2^ against ALL reflections.  The weighted R-factor wR and

 goodness of fit S are based on F^2^, conventional R-factors R are based

 on F, with F set to zero for negative F^2^. The threshold expression of

 F^2^ > 2sigma(F^2^) is used only for calculating R-factors(gt) etc. and is

 not relevant to the choice of reflections for refinement.  R-factors based

 on F^2^ are statistically about twice as large as those based on F, and R-

 factors based on ALL data will be even larger.

;

 

_refine_ls_structure_factor_coef  Fsqd

_refine_ls_matrix_type            full

_refine_ls_weighting_scheme       calc

_refine_ls_weighting_details

 'calc w=1/[\s^2^(Fo^2^)+(0.0416P)^2^+0.3021P] where P=(Fo^2^+2Fc^2^)/3'

_atom_sites_solution_primary      direct

_atom_sites_solution_secondary    difmap

_atom_sites_solution_hydrogens    geom

_refine_ls_hydrogen_treatment     mixed

_refine_ls_extinction_method      none

_refine_ls_extinction_coef        ?

_refine_ls_abs_structure_details

 'Flack H D (1983), Acta Cryst. A39, 876-881'

_refine_ls_abs_structure_Flack    0.04(8)
_chemical_absolute_configuration  rm

_refine_ls_number_reflns          6351

_refine_ls_number_parameters      416

_refine_ls_number_restraints      1

_refine_ls_R_factor_all           0.0613

_refine_ls_R_factor_gt            0.0377

_refine_ls_wR_factor_ref          0.0906

_refine_ls_wR_factor_gt           0.0797

_refine_ls_goodness_of_fit_ref    1.002

_refine_ls_restrained_S_all       1.003

_refine_ls_shift/su_max           0.000

_refine_ls_shift/su_mean          0.000

 

loop_

 _atom_site_label

 _atom_site_type_symbol

 _atom_site_fract_x

 _atom_site_fract_y

 _atom_site_fract_z

 _atom_site_U_iso_or_equiv

 _atom_site_adp_type

 _atom_site_occupancy

 _atom_site_symmetry_multiplicity

 _atom_site_calc_flag

 _atom_site_refinement_flags

 _atom_site_disorder_assembly

 _atom_site_disorder_group

P1 P 0.42724(5) 0.63361(3) 0.156249(17) 0.04819(10) Uani 1 1 d . . .

O1 O 0.56250(12) 0.62951(6) 0.10770(4) 0.0455(2) Uani 1 1 d . . .

O2 O 0.52517(13) 0.70918(7) 0.19805(4) 0.0546(3) Uani 1 1 d . . .

O3 O 0.81169(12) 0.95174(7) 0.10679(4) 0.0481(3) Uani 1 1 d . . .

O4 O 1.02749(12) 0.80684(7) 0.12293(4) 0.0516(3) Uani 1 1 d . . .

N1 N 0.44998(16) 0.51729(9) 0.17758(5) 0.0497(3) Uani 1 1 d . . .

C1 C 0.59650(17) 0.71951(10) 0.08189(6) 0.0428(4) Uani 1 1 d . . .

C2 C 0.69789(17) 0.78713(10) 0.10705(6) 0.0402(3) Uani 1 1 d . . .

C3 C 0.72893(17) 0.87714(10) 0.08003(6) 0.0436(4) Uani 1 1 d . . .

C4 C 0.6695(2) 0.89431(12) 0.02930(6) 0.0539(4) Uani 1 1 d . . .

H4A H 0.6885(17) 0.9579(11) 0.0126(6) 0.050(4) Uiso 1 1 d . . .

C5 C 0.5762(2) 0.82313(13) 0.00468(7) 0.0602(5) Uani 1 1 d . . .

H5A H 0.546(2) 0.8331(13) -0.0297(7) 0.077(6) Uiso 1 1 d . . .

C6 C 0.5369(2) 0.73579(12) 0.03103(7) 0.0548(4) Uani 1 1 d . . .

H6A H 0.465(2) 0.6877(11) 0.0169(6) 0.062(5) Uiso 1 1 d . . .

C7 C 0.77376(17) 0.76328(9) 0.15911(6) 0.0404(3) Uani 1 1 d . . .

C8 C 0.6877(2) 0.72390(10) 0.20230(6) 0.0470(4) Uani 1 1 d . . .

C9 C 0.7600(2) 0.70775(11) 0.25186(7) 0.0586(5) Uani 1 1 d . . .

H9A H 0.698(2) 0.6825(12) 0.2805(6) 0.063(5) Uiso 1 1 d . . .

C10 C 0.9188(3) 0.72825(12) 0.25821(7) 0.0640(5) Uani 1 1 d . . .

H10A H 0.969(2) 0.7171(13) 0.2924(7) 0.079(6) Uiso 1 1 d . . .

C11 C 1.0081(2) 0.76261(12) 0.21559(7) 0.0585(5) Uani 1 1 d . . .

H11A H 1.117(2) 0.7682(13) 0.2205(6) 0.065(5) Uiso 1 1 d . . .

C12 C 0.93618(19) 0.77923(10) 0.16652(6) 0.0453(4) Uani 1 1 d . . .

C13 C 1.0848(2) 0.90903(12) 0.12295(7) 0.0568(4) Uani 1 1 d . . .

H13A H 1.0828(19) 0.9334(11) 0.1595(6) 0.054(4) Uiso 1 1 d . . .

C14 C 0.9722(2) 0.97056(11) 0.08910(7) 0.0533(4) Uani 1 1 d . . .

H14A H 0.9754(18) 0.9477(11) 0.0516(6) 0.048(4) Uiso 1 1 d . . .

C15 C 1.2532(2) 0.90723(17) 0.10135(12) 0.0935(8) Uani 1 1 d . . .

H15A H 1.2947 0.9741 0.1005 0.119(8) Uiso 1 1 calc R . .

H15B H 1.2531 0.8800 0.0656 0.111(8) Uiso 1 1 calc R . .

H15C H 1.3184 0.8665 0.1242 0.133 Uiso 1 1 calc R . .

C16 C 1.0007(3) 1.08273(13) 0.09466(10) 0.0840(7) Uani 1 1 d . . .

H16A H 1.1103 1.0973 0.0874 0.101 Uiso 1 1 calc R . .

H16B H 0.9751 1.1035 0.1306 0.138(10) Uiso 1 1 calc R . .

H16C H 0.9347 1.1181 0.0695 0.165 Uiso 1 1 calc R . .

C17 C 0.3048(2) 0.46275(11) 0.19649(7) 0.0509(4) Uani 1 1 d . . .

H17A H 0.3455(19) 0.3982(12) 0.2049(6) 0.053(4) Uiso 1 1 d . . .

C18 C 0.18227(18) 0.45087(11) 0.15239(7) 0.0498(4) Uani 1 1 d . . .

C19 C 0.0649(2) 0.52098(13) 0.14281(7) 0.0602(5) Uani 1 1 d . . .

H19A H 0.055(2) 0.5740(13) 0.1654(7) 0.072(5) Uiso 1 1 d . . .

C20 C -0.0409(2) 0.51071(16) 0.10106(9) 0.0748(6) Uani 1 1 d . . .

H20A H -0.123(3) 0.5627(15) 0.0966(8) 0.097(7) Uiso 1 1 d . . .

C21 C -0.0315(3) 0.42844(17) 0.06863(8) 0.0809(6) Uani 1 1 d . . .

H21A H -0.1022 0.4211 0.0402 0.097 Uiso 1 1 calc R . .

C22 C 0.0814(3) 0.35668(16) 0.07779(8) 0.0828(6) Uani 1 1 d . . .

H22A H 0.0868 0.3006 0.0557 0.099 Uiso 1 1 calc R . .

C23 C 0.1869(2) 0.36732(13) 0.11957(7) 0.0642(5) Uani 1 1 d . . .

H23A H 0.263(2) 0.3183(13) 0.1278(7) 0.067(5) Uiso 1 1 d . . .

C24 C 0.2390(3) 0.50696(14) 0.24854(7) 0.0698(5) Uani 1 1 d . . .

H24A H 0.1544 0.4654 0.2616 0.094(7) Uiso 1 1 calc R . .

H24B H 0.1992 0.5731 0.2417 0.113 Uiso 1 1 calc R . .

H24C H 0.3220 0.5102 0.2750 0.113 Uiso 1 1 calc R . .

C25 C 0.6029(2) 0.46293(12) 0.18157(7) 0.0563(5) Uani 1 1 d . . .

H25A H 0.6833(18) 0.5099(12) 0.1637(6) 0.054(4) Uiso 1 1 d . . .

C26 C 0.59883(19) 0.36978(12) 0.14681(7) 0.0550(4) Uani 1 1 d . . .

C27 C 0.5719(3) 0.37984(14) 0.09212(8) 0.0737(6) Uani 1 1 d . . .

H27A H 0.562(3) 0.4449(15) 0.0785(8) 0.089(6) Uiso 1 1 d . . .

C28 C 0.5630(3) 0.29842(16) 0.05915(9) 0.0886(7) Uani 1 1 d . . .

H28A H 0.534(3) 0.3061(15) 0.0212(9) 0.102(7) Uiso 1 1 d . . .

C29 C 0.5817(3) 0.20281(16) 0.07956(9) 0.0917(7) Uani 1 1 d D . .

H29A H 0.561(3) 0.1449(16) 0.0566(8) 0.095(7) Uiso 1 1 d . . .

C30 C 0.6068(3) 0.19131(14) 0.13296(9) 0.0893(7) Uani 1 1 d D . .

H30A H 0.612(3) 0.1260(17) 0.1479(8) 0.105(7) Uiso 1 1 d . . .

C31 C 0.6162(2) 0.27356(13) 0.16655(8) 0.0709(5) Uani 1 1 d . . .

H31A H 0.6344 0.2640 0.2031 0.085 Uiso 1 1 calc R . .

C32 C 0.6495(3) 0.44331(15) 0.24006(8) 0.0801(6) Uani 1 1 d . . .

H32A H 0.5993 0.3830 0.2523 0.101(7) Uiso 1 1 calc R . .

H32B H 0.6158 0.4985 0.2620 0.121 Uiso 1 1 calc R . .

H32C H 0.7628 0.4362 0.2426 0.121 Uiso 1 1 calc R . .

 

loop_

 _atom_site_aniso_label

 _atom_site_aniso_U_11

 _atom_site_aniso_U_22

 _atom_site_aniso_U_33

 _atom_site_aniso_U_23

 _atom_site_aniso_U_13

 _atom_site_aniso_U_12

P1 0.0499(2) 0.03547(16) 0.0592(2) 0.00482(18) 0.0032(2) -0.00027(17)

O1 0.0536(6) 0.0343(4) 0.0485(5) 0.0002(4) -0.0006(5) -0.0048(5)

O2 0.0636(6) 0.0452(5) 0.0551(6) -0.0080(5) 0.0162(5) -0.0061(5)

O3 0.0547(6) 0.0347(5) 0.0548(6) -0.0023(5) 0.0063(5) -0.0010(5)

O4 0.0510(6) 0.0400(5) 0.0639(7) -0.0070(5) 0.0043(5) 0.0007(5)

N1 0.0533(7) 0.0370(6) 0.0586(8) 0.0054(5) 0.0011(6) -0.0007(6)

C1 0.0476(8) 0.0380(7) 0.0430(8) 0.0003(6) 0.0009(7) 0.0019(6)

C2 0.0431(7) 0.0364(7) 0.0409(8) -0.0002(6) 0.0002(6) 0.0029(6)

C3 0.0483(8) 0.0343(7) 0.0481(8) -0.0006(7) 0.0022(7) 0.0038(6)

C4 0.0627(10) 0.0465(8) 0.0524(10) 0.0130(7) 0.0008(8) 0.0031(8)

C5 0.0704(11) 0.0630(9) 0.0473(10) 0.0111(8) -0.0092(9) -0.0027(9)

C6 0.0599(10) 0.0528(9) 0.0517(9) -0.0029(8) -0.0098(8) -0.0022(8)

C7 0.0524(8) 0.0293(6) 0.0396(7) -0.0035(6) -0.0009(7) 0.0001(6)

C8 0.0615(9) 0.0334(7) 0.0460(8) -0.0038(7) 0.0015(8) -0.0013(7)

C9 0.0957(13) 0.0388(8) 0.0413(9) -0.0012(7) 0.0021(9) -0.0004(8)

C10 0.0964(13) 0.0466(8) 0.0489(10) -0.0020(8) -0.0199(10) 0.0045(10)

C11 0.0686(11) 0.0420(8) 0.0649(11) -0.0086(8) -0.0207(9) 0.0066(8)

C12 0.0576(8) 0.0299(6) 0.0482(9) -0.0058(6) -0.0009(8) 0.0035(7)

C13 0.0558(10) 0.0476(8) 0.0669(11) -0.0064(8) 0.0053(9) -0.0091(8)

C14 0.0580(9) 0.0436(8) 0.0583(10) -0.0027(7) 0.0099(8) -0.0093(7)

C15 0.0584(12) 0.0801(13) 0.142(2) 0.0073(15) 0.0163(13) -0.0072(11)

C16 0.0862(14) 0.0467(9) 0.1192(18) 0.0082(11) 0.0085(13) -0.0147(10)

C17 0.0642(10) 0.0354(7) 0.0532(9) 0.0035(7) 0.0092(8) -0.0050(7)

C18 0.0552(9) 0.0406(7) 0.0536(9) 0.0017(7) 0.0139(8) -0.0093(7)

C19 0.0543(9) 0.0534(9) 0.0730(12) -0.0038(8) 0.0095(9) -0.0034(8)

C20 0.0549(11) 0.0825(13) 0.0869(14) 0.0146(11) 0.0058(10) -0.0056(10)

C21 0.0738(13) 0.0982(15) 0.0706(13) 0.0089(11) -0.0086(10) -0.0234(12)

C22 0.1088(16) 0.0709(12) 0.0687(12) -0.0154(10) -0.0014(12) -0.0198(13)

C23 0.0829(12) 0.0454(8) 0.0644(11) -0.0042(9) 0.0050(10) -0.0027(9)

C24 0.0886(13) 0.0654(11) 0.0553(11) -0.0040(9) 0.0150(10) -0.0078(10)

C25 0.0566(10) 0.0440(8) 0.0683(11) 0.0087(8) -0.0063(8) 0.0031(8)

C26 0.0531(9) 0.0476(8) 0.0642(10) 0.0065(8) 0.0038(8) 0.0064(7)

C27 0.0968(14) 0.0593(10) 0.0651(12) 0.0053(9) 0.0106(11) 0.0150(11)

C28 0.1265(19) 0.0762(13) 0.0632(12) -0.0053(11) 0.0126(14) 0.0194(14)

C29 0.1251(19) 0.0627(12) 0.0871(15) -0.0192(11) 0.0138(15) 0.0136(13)

C30 0.1290(19) 0.0471(10) 0.0917(15) 0.0015(10) 0.0088(14) 0.0239(12)

C31 0.0880(13) 0.0526(9) 0.0720(12) 0.0042(9) 0.0017(10) 0.0185(9)

C32 0.1039(15) 0.0565(10) 0.0800(13) 0.0061(10) -0.0306(12) 0.0074(11)

 

_geom_special_details

;

 All esds (except the esd in the dihedral angle between two l.s. planes)

 are estimated using the full covariance matrix.  The cell esds are taken

 into account individually in the estimation of esds in distances, angles

 and torsion angles; correlations between esds in cell parameters are only

 used when they are defined by crystal symmetry.  An approximate (isotropic)

 treatment of cell esds is used for estimating esds involving l.s. planes.

;

 

loop_

 _geom_bond_atom_site_label_1

 _geom_bond_atom_site_label_2

 _geom_bond_distance

 _geom_bond_site_symmetry_2

 _geom_bond_publ_flag

P1 N1 1.6535(12) . ?

P1 O1 1.6603(11) . ?

P1 O2 1.6671(11) . ?

O1 C1 1.3929(16) . ?

O2 C8 1.386(2) . ?

O3 C3 1.3863(17) . ?

O3 C14 1.442(2) . ?

O4 C12 1.3792(18) . ?

O4 C13 1.4482(18) . ?

N1 C25 1.481(2) . ?

N1 C17 1.498(2) . ?

C1 C6 1.378(2) . ?

C1 C2 1.3914(19) . ?

C2 C3 1.4024(19) . ?

C2 C7 1.478(2) . ?

C3 C4 1.376(2) . ?

C4 C5 1.377(2) . ?

C4 H4A 0.960(15) . ?

C5 C6 1.379(2) . ?

C5 H5A 0.902(18) . ?

C6 H6A 0.950(16) . ?

C7 C12 1.396(2) . ?

C7 C8 1.398(2) . ?

C8 C9 1.391(2) . ?

C9 C10 1.373(3) . ?

C9 H9A 0.945(16) . ?

C10 C11 1.378(3) . ?

C10 H10A 0.961(18) . ?

C11 C12 1.380(2) . ?

C11 H11A 0.926(18) . ?

C13 C14 1.511(2) . ?

C13 C15 1.516(3) . ?

C13 H13A 0.966(15) . ?

C14 C16 1.524(2) . ?

C14 H14A 0.982(15) . ?

C15 H15A 0.9600 . ?

C15 H15B 0.9600 . ?

C15 H15C 0.9600 . ?

C16 H16A 0.9600 . ?

C16 H16B 0.9600 . ?

C16 H16C 0.9600 . ?

C17 C18 1.514(2) . ?

C17 C24 1.527(2) . ?

C17 H17A 0.951(15) . ?

C18 C19 1.382(2) . ?

C18 C23 1.384(2) . ?

C19 C20 1.375(3) . ?

C19 H19A 0.908(17) . ?

C20 C21 1.366(3) . ?

C20 H20A 0.99(2) . ?

C21 C22 1.369(3) . ?

C21 H21A 0.9300 . ?

C22 C23 1.374(3) . ?

C22 H22A 0.9300 . ?

C23 H23A 0.940(17) . ?

C24 H24A 0.9600 . ?

C24 H24B 0.9600 . ?

C24 H24C 0.9600 . ?

C25 C26 1.516(2) . ?

C25 C32 1.529(3) . ?

C25 H25A 1.024(16) . ?

C26 C31 1.384(2) . ?

C26 C27 1.386(2) . ?

C27 C28 1.364(3) . ?

C27 H27A 0.937(19) . ?

C28 C29 1.384(3) . ?

C28 H28A 0.98(2) . ?

C29 C30 1.353(3) . ?

C29 H29A 0.98(2) . ?

C30 C31 1.383(3) . ?

C30 H30A 0.95(2) . ?

C31 H31A 0.9300 . ?

C32 H32A 0.9600 . ?

C32 H32B 0.9600 . ?

C32 H32C 0.9600 . ?

 

loop_

 _geom_angle_atom_site_label_1

 _geom_angle_atom_site_label_2

 _geom_angle_atom_site_label_3

 _geom_angle

 _geom_angle_site_symmetry_1

 _geom_angle_site_symmetry_3

 _geom_angle_publ_flag

N1 P1 O1 97.06(6) . . ?

N1 P1 O2 108.18(6) . . ?

O1 P1 O2 97.73(5) . . ?

C1 O1 P1 116.58(8) . . ?

C8 O2 P1 128.42(9) . . ?

C3 O3 C14 116.71(11) . . ?

C12 O4 C13 115.95(11) . . ?

C25 N1 C17 116.68(12) . . ?

C25 N1 P1 125.66(11) . . ?

C17 N1 P1 117.62(10) . . ?

C6 C1 C2 122.24(13) . . ?

C6 C1 O1 118.98(13) . . ?

C2 C1 O1 118.65(12) . . ?

C1 C2 C3 117.10(13) . . ?

C1 C2 C7 121.25(12) . . ?

C3 C2 C7 121.61(12) . . ?

C4 C3 O3 120.18(13) . . ?

C4 C3 C2 120.97(14) . . ?

O3 C3 C2 118.70(13) . . ?

C3 C4 C5 119.97(15) . . ?

C3 C4 H4A 119.0(9) . . ?

C5 C4 H4A 120.9(9) . . ?

C4 C5 C6 120.68(15) . . ?

C4 C5 H5A 118.8(12) . . ?

C6 C5 H5A 120.4(12) . . ?

C1 C6 C5 118.86(15) . . ?

C1 C6 H6A 117.7(10) . . ?

C5 C6 H6A 123.3(10) . . ?

C12 C7 C8 117.61(13) . . ?

C12 C7 C2 120.38(13) . . ?

C8 C7 C2 122.00(13) . . ?

O2 C8 C9 118.51(14) . . ?

O2 C8 C7 120.41(14) . . ?

C9 C8 C7 120.80(15) . . ?

C10 C9 C8 119.79(16) . . ?

C10 C9 H9A 121.4(10) . . ?

C8 C9 H9A 118.8(10) . . ?

C9 C10 C11 120.57(16) . . ?

C9 C10 H10A 119.8(11) . . ?

C11 C10 H10A 119.6(12) . . ?

C10 C11 C12 119.63(17) . . ?

C10 C11 H11A 117.7(10) . . ?

C12 C11 H11A 122.4(10) . . ?

O4 C12 C11 119.58(15) . . ?

O4 C12 C7 118.87(13) . . ?

C11 C12 C7 121.46(15) . . ?

O4 C13 C14 107.69(13) . . ?

O4 C13 C15 107.23(14) . . ?

C14 C13 C15 113.44(16) . . ?

O4 C13 H13A 108.2(9) . . ?

C14 C13 H13A 109.3(9) . . ?

C15 C13 H13A 110.8(10) . . ?

O3 C14 C13 108.82(13) . . ?

O3 C14 C16 106.94(14) . . ?

C13 C14 C16 112.68(15) . . ?

O3 C14 H14A 105.1(9) . . ?

C13 C14 H14A 110.0(9) . . ?

C16 C14 H14A 112.9(9) . . ?

C13 C15 H15A 109.5 . . ?

C13 C15 H15B 109.5 . . ?

H15A C15 H15B 109.5 . . ?

C13 C15 H15C 109.5 . . ?

H15A C15 H15C 109.5 . . ?

H15B C15 H15C 109.5 . . ?

C14 C16 H16A 109.5 . . ?

C14 C16 H16B 109.5 . . ?

H16A C16 H16B 109.5 . . ?

C14 C16 H16C 109.5 . . ?

H16A C16 H16C 109.5 . . ?

H16B C16 H16C 109.5 . . ?

N1 C17 C18 112.28(13) . . ?

N1 C17 C24 111.95(13) . . ?

C18 C17 C24 114.04(14) . . ?

N1 C17 H17A 102.5(10) . . ?

C18 C17 H17A 108.0(9) . . ?

C24 C17 H17A 107.2(9) . . ?

C19 C18 C23 117.72(16) . . ?

C19 C18 C17 122.74(14) . . ?

C23 C18 C17 119.53(14) . . ?

C20 C19 C18 121.70(17) . . ?

C20 C19 H19A 119.3(12) . . ?

C18 C19 H19A 119.0(12) . . ?

C21 C20 C19 119.26(19) . . ?

C21 C20 H20A 122.8(12) . . ?

C19 C20 H20A 117.9(12) . . ?

C20 C21 C22 120.4(2) . . ?

C20 C21 H21A 119.8 . . ?

C22 C21 H21A 119.8 . . ?

C21 C22 C23 120.11(19) . . ?

C21 C22 H22A 119.9 . . ?

C23 C22 H22A 119.9 . . ?

C22 C23 C18 120.78(18) . . ?

C22 C23 H23A 122.3(11) . . ?

C18 C23 H23A 116.9(11) . . ?

C17 C24 H24A 109.5 . . ?

C17 C24 H24B 109.5 . . ?

H24A C24 H24B 109.5 . . ?

C17 C24 H24C 109.5 . . ?

H24A C24 H24C 109.5 . . ?

H24B C24 H24C 109.5 . . ?

N1 C25 C26 110.16(13) . . ?

N1 C25 C32 111.75(15) . . ?

C26 C25 C32 114.05(14) . . ?

N1 C25 H25A 104.1(9) . . ?

C26 C25 H25A 105.7(9) . . ?

C32 C25 H25A 110.4(9) . . ?

C31 C26 C27 117.10(17) . . ?

C31 C26 C25 123.93(16) . . ?

C27 C26 C25 118.94(15) . . ?

C28 C27 C26 121.44(18) . . ?

C28 C27 H27A 121.1(12) . . ?

C26 C27 H27A 117.4(12) . . ?

C27 C28 C29 120.6(2) . . ?

C27 C28 H28A 120.6(12) . . ?

C29 C28 H28A 118.6(12) . . ?

C30 C29 C28 118.9(2) . . ?

C30 C29 H29A 120.7(12) . . ?

C28 C29 H29A 119.8(12) . . ?

C29 C30 C31 120.76(19) . . ?

C29 C30 H30A 119.7(13) . . ?

C31 C30 H30A 119.4(13) . . ?

C30 C31 C26 121.20(19) . . ?

C30 C31 H31A 119.4 . . ?

C26 C31 H31A 119.4 . . ?

C25 C32 H32A 109.5 . . ?

C25 C32 H32B 109.5 . . ?

H32A C32 H32B 109.5 . . ?

C25 C32 H32C 109.5 . . ?

H32A C32 H32C 109.5 . . ?

H32B C32 H32C 109.5 . . ?

 

loop_

 _geom_torsion_atom_site_label_1

 _geom_torsion_atom_site_label_2

 _geom_torsion_atom_site_label_3

 _geom_torsion_atom_site_label_4

 _geom_torsion

 _geom_torsion_site_symmetry_1

 _geom_torsion_site_symmetry_2

 _geom_torsion_site_symmetry_3

 _geom_torsion_site_symmetry_4

 _geom_torsion_publ_flag

N1 P1 O1 C1 -172.88(10) . . . . ?

O2 P1 O1 C1 -63.36(10) . . . . ?

N1 P1 O2 C8 74.48(13) . . . . ?

O1 P1 O2 C8 -25.61(13) . . . . ?

O1 P1 N1 C25 38.05(13) . . . . ?

O2 P1 N1 C25 -62.52(14) . . . . ?

O1 P1 N1 C17 -144.32(11) . . . . ?

O2 P1 N1 C17 115.12(11) . . . . ?

P1 O1 C1 C6 -104.52(14) . . . . ?

P1 O1 C1 C2 79.54(14) . . . . ?

C6 C1 C2 C3 4.5(2) . . . . ?

O1 C1 C2 C3 -179.73(12) . . . . ?

C6 C1 C2 C7 -173.44(14) . . . . ?

O1 C1 C2 C7 2.4(2) . . . . ?

C14 O3 C3 C4 -75.42(17) . . . . ?

C14 O3 C3 C2 108.93(15) . . . . ?

C1 C2 C3 C4 -4.1(2) . . . . ?

C7 C2 C3 C4 173.76(14) . . . . ?

C1 C2 C3 O3 171.47(12) . . . . ?

C7 C2 C3 O3 -10.6(2) . . . . ?

O3 C3 C4 C5 -174.61(15) . . . . ?

C2 C3 C4 C5 0.9(2) . . . . ?

C3 C4 C5 C6 2.2(3) . . . . ?

C2 C1 C6 C5 -1.5(2) . . . . ?

O1 C1 C6 C5 -177.31(15) . . . . ?

C4 C5 C6 C1 -1.9(3) . . . . ?

C1 C2 C7 C12 132.35(14) . . . . ?

C3 C2 C7 C12 -45.47(19) . . . . ?

C1 C2 C7 C8 -47.30(19) . . . . ?

C3 C2 C7 C8 134.88(14) . . . . ?

P1 O2 C8 C9 -123.30(13) . . . . ?

P1 O2 C8 C7 62.74(17) . . . . ?

C12 C7 C8 O2 178.04(12) . . . . ?

C2 C7 C8 O2 -2.3(2) . . . . ?

C12 C7 C8 C9 4.2(2) . . . . ?

C2 C7 C8 C9 -176.12(13) . . . . ?

O2 C8 C9 C10 -175.60(14) . . . . ?

C7 C8 C9 C10 -1.7(2) . . . . ?

C8 C9 C10 C11 -1.4(2) . . . . ?

C9 C10 C11 C12 1.8(2) . . . . ?

C13 O4 C12 C11 -74.36(17) . . . . ?

C13 O4 C12 C7 109.20(15) . . . . ?

C10 C11 C12 O4 -175.47(13) . . . . ?

C10 C11 C12 C7 0.9(2) . . . . ?

C8 C7 C12 O4 172.53(11) . . . . ?

C2 C7 C12 O4 -7.14(18) . . . . ?

C8 C7 C12 C11 -3.8(2) . . . . ?

C2 C7 C12 C11 176.49(13) . . . . ?

C12 O4 C13 C14 -96.77(15) . . . . ?

C12 O4 C13 C15 140.81(16) . . . . ?

C3 O3 C14 C13 -93.15(15) . . . . ?

C3 O3 C14 C16 144.87(14) . . . . ?

O4 C13 C14 O3 50.45(17) . . . . ?

C15 C13 C14 O3 168.96(15) . . . . ?

O4 C13 C14 C16 168.88(15) . . . . ?

C15 C13 C14 C16 -72.6(2) . . . . ?

C25 N1 C17 C18 -120.44(14) . . . . ?

P1 N1 C17 C18 61.71(15) . . . . ?

C25 N1 C17 C24 109.79(16) . . . . ?

P1 N1 C17 C24 -68.06(16) . . . . ?

N1 C17 C18 C19 -89.56(18) . . . . ?

C24 C17 C18 C19 39.1(2) . . . . ?

N1 C17 C18 C23 89.84(17) . . . . ?

C24 C17 C18 C23 -141.47(16) . . . . ?

C23 C18 C19 C20 -2.3(2) . . . . ?

C17 C18 C19 C20 177.14(16) . . . . ?

C18 C19 C20 C21 1.0(3) . . . . ?

C19 C20 C21 C22 0.4(3) . . . . ?

C20 C21 C22 C23 -0.4(3) . . . . ?

C21 C22 C23 C18 -1.0(3) . . . . ?

C19 C18 C23 C22 2.3(3) . . . . ?

C17 C18 C23 C22 -177.17(17) . . . . ?

C17 N1 C25 C26 62.00(18) . . . . ?

P1 N1 C25 C26 -120.35(13) . . . . ?

C17 N1 C25 C32 -65.87(18) . . . . ?

P1 N1 C25 C32 111.78(15) . . . . ?

N1 C25 C26 C31 -119.07(18) . . . . ?

C32 C25 C26 C31 7.5(2) . . . . ?

N1 C25 C26 C27 59.1(2) . . . . ?

C32 C25 C26 C27 -174.34(18) . . . . ?

C31 C26 C27 C28 -0.1(3) . . . . ?

C25 C26 C27 C28 -178.3(2) . . . . ?

C26 C27 C28 C29 -0.4(4) . . . . ?

C27 C28 C29 C30 0.9(4) . . . . ?

C28 C29 C30 C31 -1.0(4) . . . . ?

C29 C30 C31 C26 0.6(4) . . . . ?

C27 C26 C31 C30 0.0(3) . . . . ?

C25 C26 C31 C30 178.1(2) . . . . ?

 

_diffrn_measured_fraction_theta_max    0.999

_diffrn_reflns_theta_full              27.41

_diffrn_measured_fraction_theta_full   0.999

_refine_diff_density_max    0.125

_refine_diff_density_min   -0.174

_refine_diff_density_rms    0.033
